# Supplementary material
Source: PubMed Central journal article supplement (PMC4810690)
Supplement: JVI.02849-15_zjv999091383so1.pdf [file JVI.02849-15_zjv999091383so1.pdf]

## Supplementary Figure

Supplementary Figure. (A). Alignment of BUNV and OROV NSs proteins. The red box highlights the residues deleted in OROV C-terminal NSs mutant (rOROV246NSs). The yellow highlight shows the 'LPS' motif that is conserved in orthobunyavirus NSs proteins as described in (57) (B). Alignment of all Simbu serogroup virus NSs proteins. Amino acid residues LPC (highlighted in yellow) are conserved amongst all the Clade A Simbu viruses.

**A**

20 40 60 80 100  
 BUNV **MMSLLTPAVL LTQRSHLTL** SVSTPLGLVM TTY**ESSTL**KD **ARLKLVSQKE** VNGKLHLTLG **AGRLLYIIRI** FLATGTT**QFL** **TMVLPSTASV** **DSLPGTYLRR** C\* 102  
 OROV -**MYHNLHLH LIRRHMMWHL** KLD**TDKCSML** VL**LESSSSTK** **RRPKMSYVRH** RGPWLTLLLV **GSNLQWLITI** SHSS**RIQCR** **TTVLPCTVCQ** DT\*----- -- 92

**B**

|                      |                            | 20           | 40          | 60                 | 80                 | 92         |            |            |                   |            |          |       |    |
|----------------------|----------------------------|--------------|-------------|--------------------|--------------------|------------|------------|------------|-------------------|------------|----------|-------|----|
| Clade A              | Oropouche (KP052852)       | M- Y- HNGHLH | HL IRRQHMMH | LKLD <b>TDKCSM</b> | LVL <b>LESSSST</b> | KRRPKMSYVR | HRGPWLTLLL | VGSNLQWLIT | ISHSS <b>RIQC</b> | RTTVLPCTVC | ----QDT* | 92    |    |
|                      | Iquitos (KF697144)         | ..           | ..          | ..                 | ..                 | ..         | ..         | ..         | ..N               | ..         | ----R    | 92    |    |
|                      | Madre de Dios (KF697146)   | <b>M</b> -   | ..          | ..                 | ..A                | ..         | ..K        | R          | ..                | ..C        | ..       | ----L | 93 |
|                      | Jatobal (JQ675601)         | <b>M</b> -   | <b>K</b>    | ..                 | ..N                | ..         | ..R        | ..         | ..N               | ..E        | ..L      | ....Q | 93 |
|                      | Facey's Paddock (KF697136) | ..           | ..R         | R                  | ..                 | ..R        | ..         | ..R        | ..                | ..E        | ..S      | ....F | 96 |
|                      | Buttonwillow (KF697162)    | <b>M</b> -   | L           | <b>P</b>           | R                  | <b>T</b>   | ..         | ..S        | ..EQA             | A          | ..S      | ..F   | 97 |
|                      | Cat Que (JQ675600)         | <b>M</b> -   | LS          | <b>N</b>           | R                  | ..         | ..HN       | ..         | ..IH              | GQT        | L        | ..TP  | 97 |
|                      | Oya (JX983192)             | <b>M</b> -   | LS          | <b>N</b>           | R                  | ..         | ..HN       | ..         | ..IH              | GQT        | L        | ..TP  | 97 |
|                      | Ingwavuma (KF697141)       | <b>M</b> -   | L           | <b>N</b>           | R                  | ..         | ..HN       | ..Y        | ..IH              | EQT        | L        | ..TP  | 97 |
|                      | Mermet (KF697152)          | ..           | L           | <b>N</b>           | R                  | ..         | ..HN       | ..Y        | ..IH              | EQT        | L        | ..TP  | 96 |
|                      | Manzanilla (KF697148)      | <b>M</b> -   | L           | <b>N</b>           | R                  | ..         | ..HN       | ..Y        | ..IH              | EQT        | L        | ..TP  | 97 |
|                      | Simbu (HE795110)           | ..           | L           | TY                 | ..                 | V          | ..         | G          | ..                | LVGMGNL    | S        | ..    | 92 |
|                      | Shuni (HE800143)           | ..           | F           | L                  | IS                 | R          | T          | SG         | ..                | L          | NMGPN    | I     | 92 |
| Aino (HE795089)      | ..                         | F            | L           | IS                 | R                  | T          | SG         | ..         | L                 | NMGPN      | I        | 92    |    |
| Peaton (HE795095)    | ..                         | F            | L           | IS                 | R                  | T          | SG         | ..         | L                 | NMGPS      | I        | 92    |    |
| Akabane              | ..                         | F            | ..          | MQ                 | ..                 | M          | G          | ..         | SVSMGSS           | T          | ..L      | 92    |    |
| Tinaroo (AB000819)   | ..                         | F            | ..          | MQ                 | ..                 | T          | M          | G          | ..                | SVSMGSS    | T        | ..L   | 92 |
| Sabo (HE795098)      | ..                         | MF           | ..          | MQ                 | ..                 | T          | TRG        | ..R        | SVSMGNI           | T          | SL       | 93    |    |
| Douglas (HE795092)   | ..                         | ..           | MQ          | ..                 | T                  | ..         | SG         | ..         | LVSMGNN           | I          | S        | 92    |    |
| Sathuperi (HE795104) | ..                         | ..           | MQ          | ..                 | T                  | ..         | LG         | ..         | LVSMGSN           | T          | S        | 92    |    |
| Schmallenberg        | ..                         | ..           | MQ          | ..                 | T                  | ..         | SG         | ..         | LVSMGNN           | T          | S        | 92    |    |
| Shamonda (HE795107)  | ..                         | ..           | MQ          | ..                 | T                  | ..         | SG         | ..         | LVSMGNN           | I          | S        | 92    |    |
| Leanyer (HM627177)   | ..                         | <b>M</b>     | <b>ID</b>   | <b>LQSSQA</b>      | ..                 | L          | K          | <b>DT</b>  | ..I               | S          | ..H      | 94    |    |
